# Supplementary material for: Deep learning identifies heterogeneous subpopulations in breast cancer cell lines
Source: PubMed Central journal article supplement — bioRxiv. 2024 Jul 4:2024.07.02.601576. Preprint. [Version 1] doi: 10.1101/2024.07.02.601576 (PMC11245002; doi:10.1101/2024.07.02.601576), 2024-07-04
Supplement: media-1.pdf [file media-1.pdf]

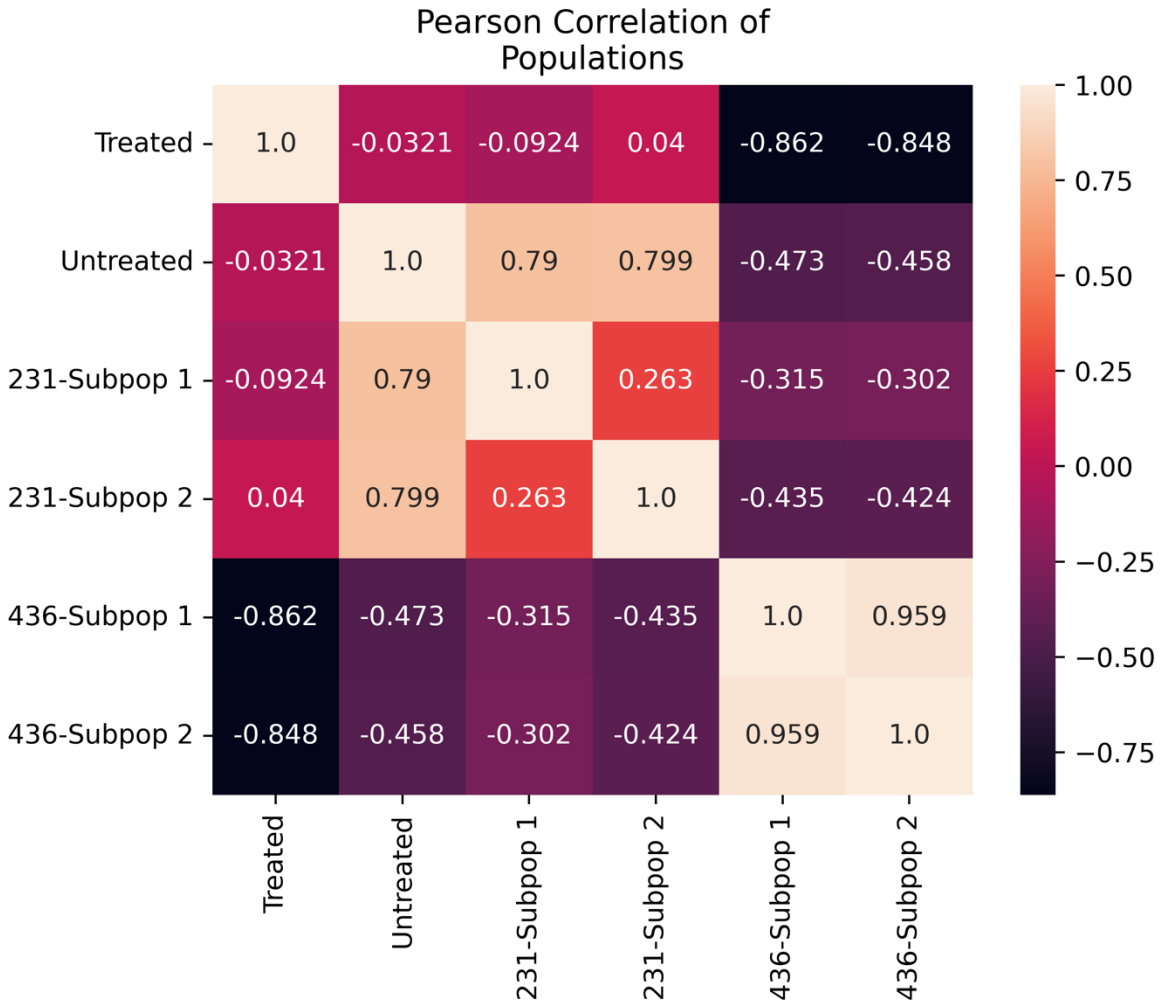

**Supplementary Figure 1.** Pearson correlation coefficient values calculated using 50 principal components from concatenated transcriptomic data.
